# Supplementary material for: Giant power factor and high air stability in an n-type metal–organic charge-transfer complex
Source: Royal Society of Chemistry journal article supplement (doi:10.1039/d2ta07409e), 2022-01-01
Supplement: d2ta07409e1.pdf [file d2ta07409e1.pdf]

## Electronic Supporting Information

# Giant Power Factor and High Air-Stability in n-Type Metal-Organic Charge-Transfer Complex

Xiaolei Li,<sup>a, b</sup> Gao Zhang,<sup>a</sup> Xin Zhang,<sup>a</sup> Weitian Zou,<sup>a</sup> Ge Li<sup>b</sup>, Jia Liang,<sup>c</sup> Haijun Wu,<sup>a</sup> Zhen Li,<sup>a</sup> Mingming Zhang,<sup>a</sup> Minqiang Wang,<sup>b</sup> Guanjun Yang<sup>\*a</sup> and Chunlei Wan<sup>\*c</sup>

<sup>a</sup> State Key Laboratory for Mechanical Behavior of Materials, School of Materials Science and Engineering, Xi'an Jiaotong University, Xi'an, Shaanxi, 710049, China. E-mail: ygj@mail.xjtu.edu.cn

<sup>b</sup> Electronic Materials Research Laboratory, Key Laboratory of Education Ministry, Shaanxi Engineering Research Center of Advanced Energy Materials and Devices, School of Electronic Science and Engineering, Xi'an Jiaotong University, Xi'an, Shaanxi, 710049, China.

<sup>c</sup> State Key Laboratory of New Ceramics and Fine Processing, School of Materials Science and Engineering, Tsinghua University, Beijing, 100871, China. E-mail: wancl@mail.tsinghua.edu.cn

## 1. EXPERIMENTAL PROCEDURES

**Materials:** All the chemicals were used as received, including CuBr<sub>2</sub> (Copper bromide, 99.999%, Sigma-Aldrich), Br-C<sub>6</sub>H<sub>4</sub>-NH<sub>2</sub> (4-Bromanilinu, 99%, TCI (Shanghai) Development Co. Ltd.), and dimethylformamide (DMF, anhydrous, 99.8%, Sigma-Aldrich). Quartz glasses (JGS1) were purchased from Donghai County Haotian quart glass products Co. Ltd. Indium tin oxide (ITO)/PET (0.125 ± 0.05 mm) were purchased from Ying Kou You Xuan Trade Co., Ltd (China). The (Br-C<sub>6</sub>H<sub>4</sub>-NH<sub>2</sub>)<sub>2</sub>CuBr<sub>2</sub> precursor solution (1.5 mol/L) was formed by dissolving Br-C<sub>6</sub>H<sub>4</sub>-NH<sub>2</sub> (1032.1 mg) and CuBr<sub>2</sub> (670.1 mg) in 2 mL of DMF. Then, the precursor solution was stirred at 60°C overnight.

**XRD characterization:** Powder X-ray diffraction (XRD) measurements were performed on an Ultima IV X-ray Diffractometer with Cu K $\alpha$  from 5 to 80° (2 $\theta$ ) at a scanning speed of 0.1 °/s. The calculated XRD pattern was performed using Reflex module package in Materials Studio.

**Morphological characterization:** SEM tests were performed on a field-emission SEM (MIRA3 TESCAN). High-resolution AFM (INNOVA) was used to test the surface roughness of the (Br-C<sub>6</sub>H<sub>4</sub>-NH<sub>2</sub>)<sub>2</sub>CuBr<sub>2</sub> film.

**UV-Vis-NIR spectra characterization:** UV-Vis-NIR spectra were measured for Br-C<sub>6</sub>H<sub>4</sub>-NH<sub>2</sub>, CuBr<sub>2</sub>, and (Br-C<sub>6</sub>H<sub>4</sub>-NH<sub>2</sub>)<sub>2</sub>CuBr<sub>2</sub> by a UV-Vis-NIR Spectrometer (PerkinElmer Lambda 950). Note that double-integrating-sphere mode were used for the measurements of Br-C<sub>6</sub>H<sub>4</sub>-NH<sub>2</sub> and CuBr<sub>2</sub> powders.

**ESR spectra characterization:** ESR spectra were measured for CuBr<sub>2</sub> (25.6mg) and (Br-C<sub>6</sub>H<sub>4</sub>-NH<sub>2</sub>)<sub>2</sub>CuBr<sub>2</sub> (26.5 mg) by an electron spin resonance spectrometer Spectrometer (Bruker EMX PLUS).

**Electronic state and band structure characterization:** The ultraviolet photoelectron spectroscopy (UPS) were performed in a PHI5000 VersaProbe III (Scanning ESCA Microprobe) spherical capacitive analyzer with a monochromatic He I light source (21.22 eV). The sample bias was -5 V. The X-ray photoelectron spectroscopy (XPS) were performed in an X-ray photoelectron spectrometer (ThermoFisher, ESCALAB 250Xi). X-ray source is a monochrome Al K $\alpha$  (1486.6 eV) radiation discharge lamp. The XPS spectra were calibrated using the binding energy of C1s (284.8 eV).

**Thermoelectric properties characterization:** Electrical conductivity, Seebeck coefficient, and thermal conductivity were measured simultaneously from 298 K to 388 K by using Physical Properties Measurement System (PPMS, Quantum Design Inc., San Diego, USA) equipped with the Thermal Transport Option (PPMS-TTO). The TTO option for the PPMS enables measurements of thermal properties, including thermal conductivity  $\kappa$  and Seebeck coefficient  $S$ , for sample materials over the entire temperature and magnetic field range of the PPMS. The TTO system measures thermal conductivity by monitoring the temperature drop along the sample as a known amount of heat passes through the sample. TTO measures the thermoelectric Seebeck effect as an electrical voltage drop that accompanies a temperature drop across certain materials. The TTO system can perform these two measurements simultaneously by monitoring both the temperature and voltage drop across a sample as a heat pulse is applied to one end. The PPMS can also measure electrical resistivity  $\rho$  by using the standard four-probe resistivity provided by the PPMS AC Transport Measurement System (ACT) option (Model P600). The thermal and electrical connections for an idealized TTO sample are shown in Figure S8.

Here, the four basic physical elements are illustrated in Figure S8: the sample, the epoxy bonds that adhere the leads to the sample, the copper leads, and the heater and thermometer shoe assemblies that screw down onto the

leads. For thermal conductivity and Seebeck coefficient measurements, heat is applied to one end of the sample by running current through the heater ( $Q_{+/-}$ ). The temperatures  $T_{\text{hot}}$  and  $T_{\text{cold}}$  are measured at the thermometer shoes. Also during the heat pulse, the Seebeck voltage ( $\Delta V = V_+ - V_-$ ) is monitored. Heat exits the sample to the coldfoot. Electrical resistivity measurements are made both before and after the heat pulse described above. Current ( $I_{+/-}$ ) flows through the sample and the voltage drop across the sample is monitored using the  $V_{+/-}$  leads.

The detailed thermoelectric results of the sample tested for 20 times from 298 K to 388 K were shown in Table S1-S7. For the measurements of thermoelectric properties, the area of the samples is  $10 \times 10 \text{ mm}^2$ . The thickness ( $\sim 1.4 \text{ }\mu\text{m}$ ) of the films was determined by Bruker-DektakXT profilometer, as shown in Figure S9. Reliability of measured data has been confirmed by measuring a Ni standard reference sample provided by Quantum Design Inc. The estimated measurements uncertainties are 8% for the electrical conductivity, 6% for the Seebeck coefficient, 11% for the thermal conductivity and 16% for the final figure of merit,  $ZT$ .

**Temperature coefficient of resistance calculation:** The temperature coefficient of resistance can be calculated by the equation  $R = R_0 [1 + \alpha (T - T_0)]$  ( $R_0$  is the resistance at an initial temperature  $T_0$  and  $R$  is the resistance at a temperature  $T$  °C). The temperature coefficient of resistance of the  $(\text{Br-C}_6\text{H}_4\text{-NH}_2)_2\text{CuBr}_2$  film was extracted from the resistance versus temperature data (see Figure S10).

**Computational details:** Density functional theory (DFT) calculations were performed by Vienna Ab-initio Simulation Package (VASP).<sup>[1, 2, 3]</sup> The all-electron projected augmented wave (PAW) potential was used to describe the ion–electron interaction, and Perdew-BurkeErnzerhof (PBE) functional in the framework of generalized gradient approximation (GGA) was used to describe the exchange and correlation function. The energy cutoff of plane wave, Energy and force convergence criteria were set to 520 eV,  $1 \times 10^{-6}$  eV, and  $1 \times 10^{-2}$  eV/Å, respectively. To analyze the behavior and stability in moisture environment, the interaction between water and the  $(\text{Br-C}_6\text{H}_4\text{-NH}_2)_2\text{CuBr}_2$  surfaces were investigated by the ab initio molecular dynamics (AIMD) simulations. The simulations were performed on a 248-atom  $(\text{Br-C}_6\text{H}_4\text{-NH}_2)_2\text{CuBr}_2$  ( $2 \times 1 \times 1$ ) (011) surface. A vacuum buffer space of 20 Å along the z direction was added to decouple possible periodic interactions. In AIMD simulations, the initial atomic positions were obtained by preheating from 100 K to 300 K for 1 ps as the pre-equilibration. Then the equilibration of 5 ps was performed in the canonical ensemble (NVT ensemble) using Nosé-Hoover thermostat with 1 fs as a temporal step at the fixed temperature of 300 K.

## 2. SUPPLEMENTARY TEXT

**First way for the calculation of Lorenz number:** For most metals, where charge carriers behave like free-

electrons, Lorenz number could be estimated as  $L_0 = \frac{\pi^2}{3} \left( \frac{k_B}{e} \right)^2 \approx 2.44 \times 10^{-8} \text{ W } \Omega \text{ K}^{-2}$  for free electrons. For

most thermoelectric materials, the real Lorenz number is in fact lower than  $L_0$ , depending on the reduced Fermi energy  $\zeta = E_F/k_B T$  and scattering parameter  $r$ .<sup>[4, 5]</sup> Assuming the main carrier scattering mechanism around room temperature is the acoustic phonon scattering,  $r$  could be  $-1/2$ . Then the Lorenz number  $L$  can be achieved as the following:

$$L = \left( \frac{k_B}{e} \right)^2 \left( \frac{3F_0(\zeta)F_2(\zeta) - 4F_1^2(\zeta)}{F_0^2(\zeta)} \right)$$

Where  $F_n(\xi)$  represents the Fermi integration,

$$F_n(\xi) = \int_0^\infty \frac{\chi^n}{1 + e^{\chi - \xi}} d\chi$$

For a single band approximation, the  $S$  can be given as the following:

$$S = \pm \left( \frac{2F_1(\xi)}{F_0(\xi)} - \xi \right)$$

**Second way for the calculation of Lorenz number:** A satisfactory approximation for  $L$  from an experimental  $S$  can be obtained via the following Equation:<sup>[6]</sup>

$$L = 1.5 + \exp \left[ -\frac{|S|}{116} \right]$$

where  $L$  is in  $10^{-8} \text{ W } \Omega \text{ K}^{-2}$  and  $S$  in  $\mu\text{V/K}$ .

### 3. SUPPLEMENTARY DATA

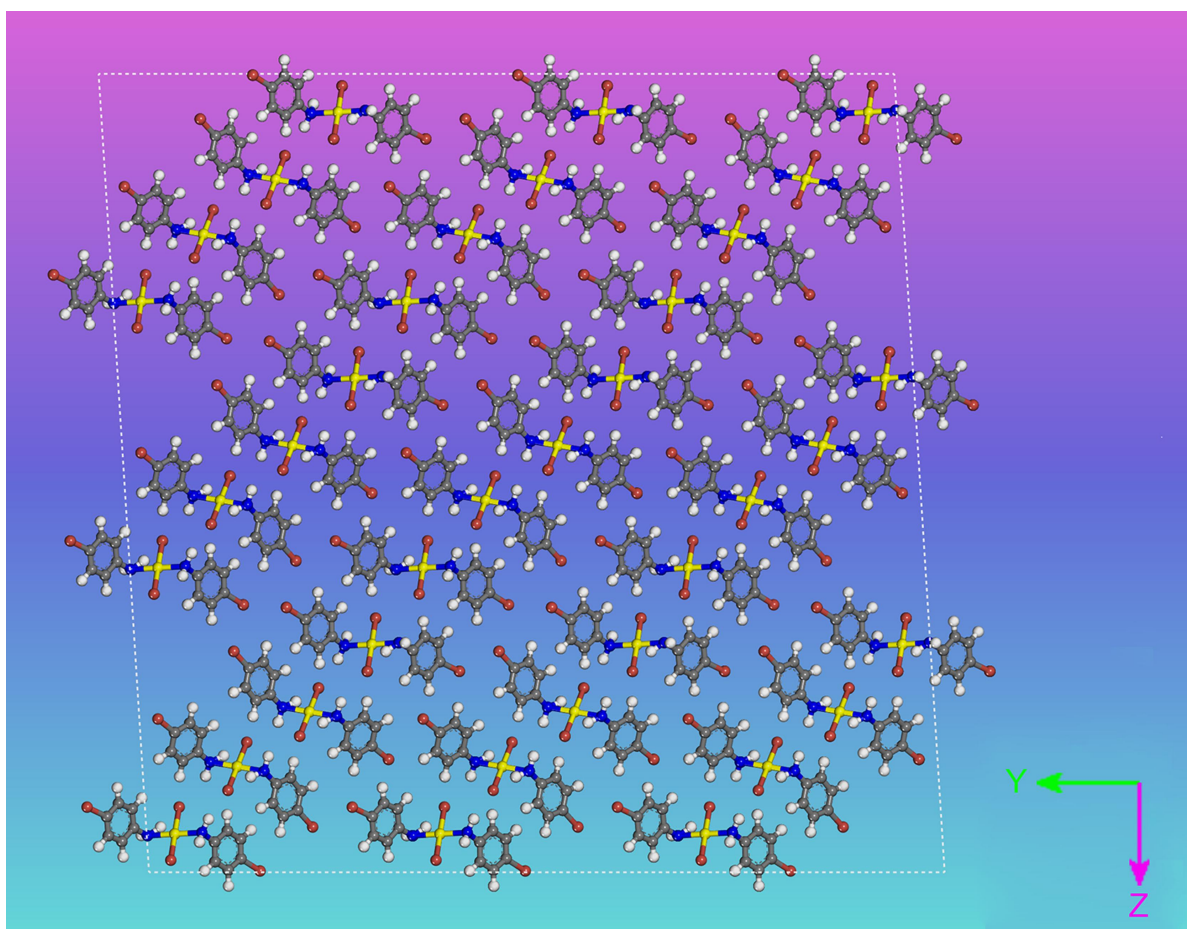

**Fig. S1** The packing structure of the  $(\text{Br-C}_6\text{H}_4\text{-NH}_2)_2\text{CuBr}_2$  ( $3 \times 3 \times 3$ ) from X-axis view.

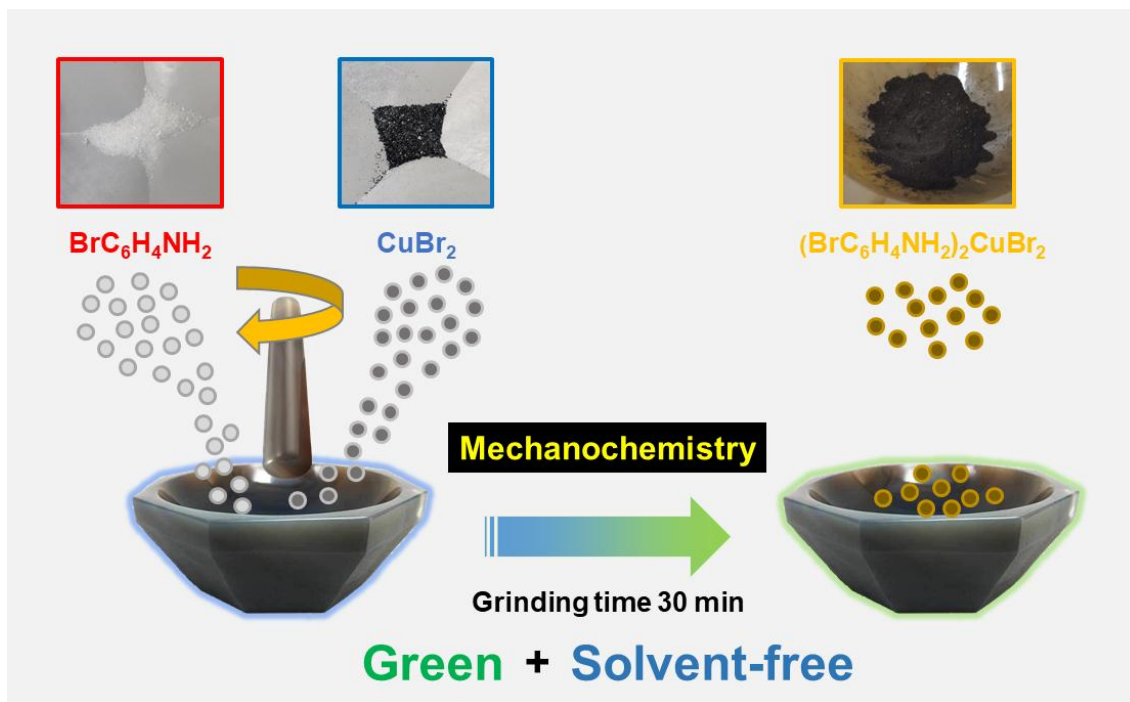

**Fig. S2** Illustration of the synthesis of  $(\text{Br-C}_6\text{H}_4\text{-NH}_2)_2\text{CuBr}_2$  powders via a mechanochemistry method. The  $(\text{Br-C}_6\text{H}_4\text{-NH}_2)_2\text{CuBr}_2$  powders were fabricated by grinding the mixture of  $\text{Br-C}_6\text{H}_4\text{-NH}_2$  and  $\text{CuBr}_2$  powders with a molar ratio of 2:1 in a mortar for 30 min. Then, the powders were heated at 50 °C for 30 min to promote the chemical reaction. Finally, to prevent the residue of the reactant remaining in the mixture, the powders were ground for 10 min. Then, black  $(\text{Br-C}_6\text{H}_4\text{-NH}_2)_2\text{CuBr}_2$  powders were obtained.

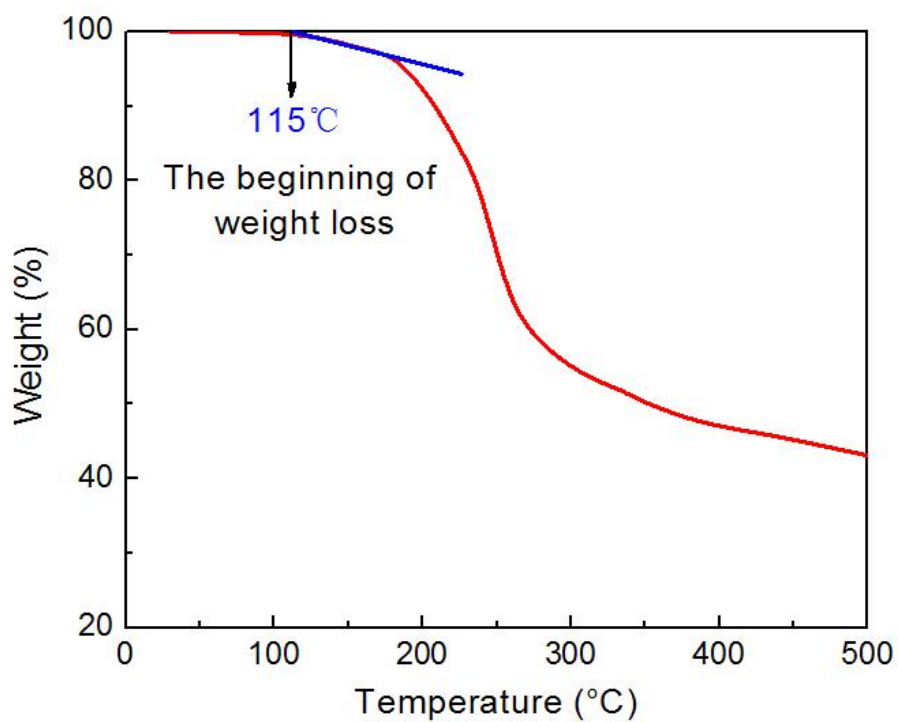

**Fig. S3** Thermo gravimetric analysis curve of  $(\text{Br-C}_6\text{H}_4\text{-NH}_2)_2\text{CuBr}_2$  powders obtained via a mechanochemistry method.

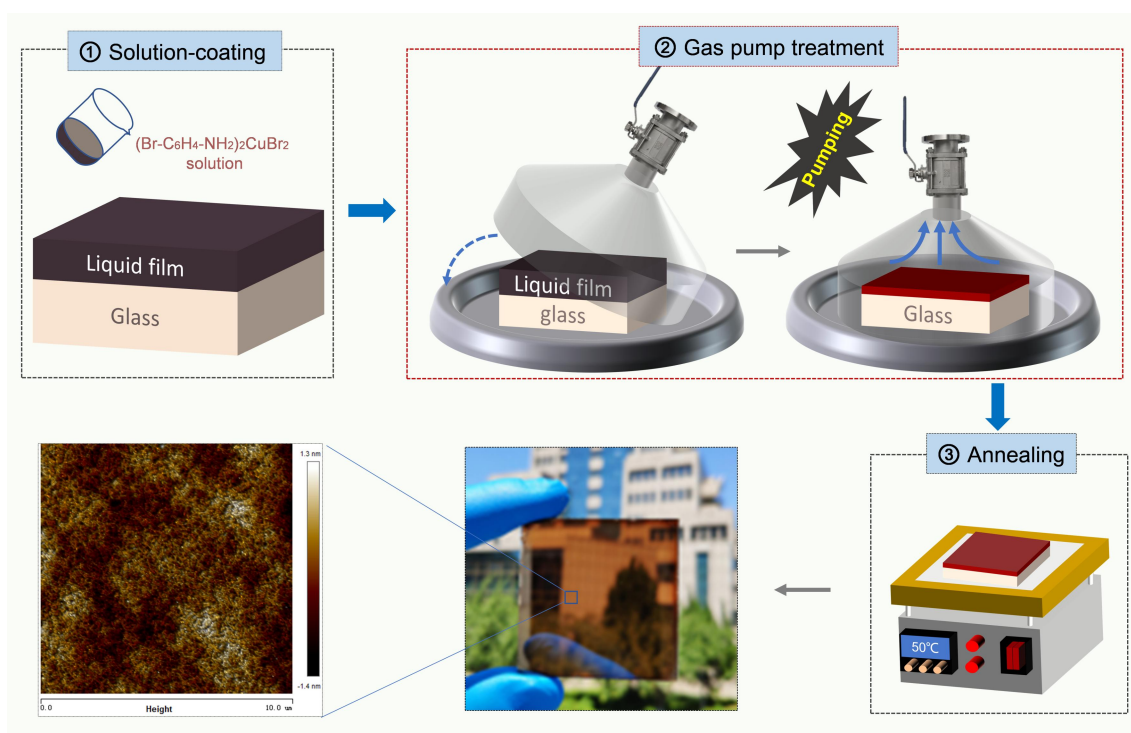

**Fig. S4** Gas pump treatment procedure for preparing a  $(\text{Br-C}_6\text{H}_4\text{-NH}_2)_2\text{CuBr}_2$  film.



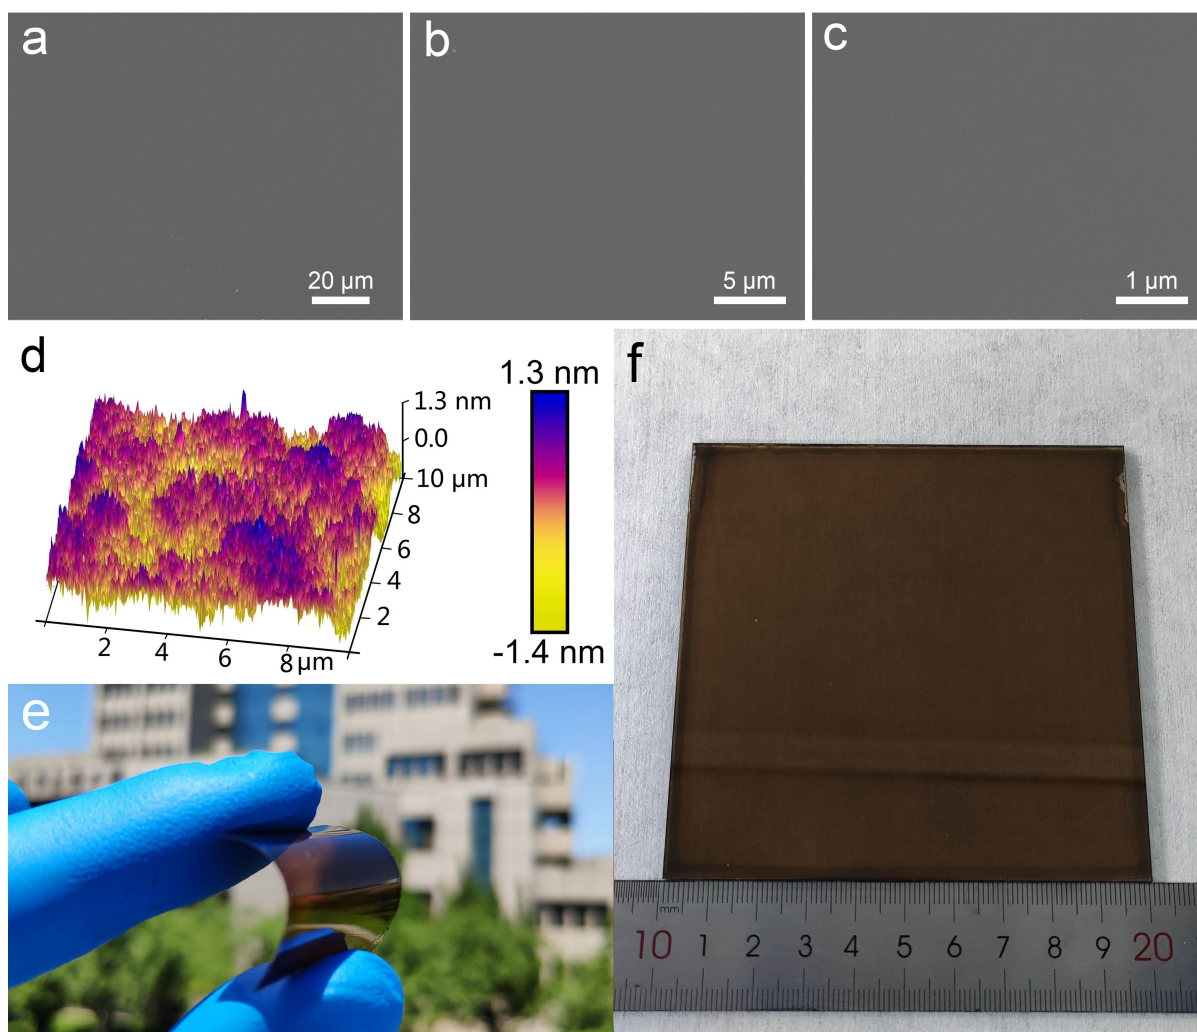

**Fig. S5** (a-c) SEM images of the  $(\text{Br-C}_6\text{H}_4\text{-NH}_2)_2\text{CuBr}_2$  film at different magnifications. d. High-resolution 3D image atomic force microscopy of  $(\text{Br-C}_6\text{H}_4\text{-NH}_2)_2\text{CuBr}_2$  film. e. A photograph of one  $(\text{Br-C}_6\text{H}_4\text{-NH}_2)_2\text{CuBr}_2$  film deposited on flexible PET/ITO substrate. f. Photographs of large-area ( $100 \text{ cm}^2$ )  $(\text{Br-C}_6\text{H}_4\text{-NH}_2)_2\text{CuBr}_2$  films.

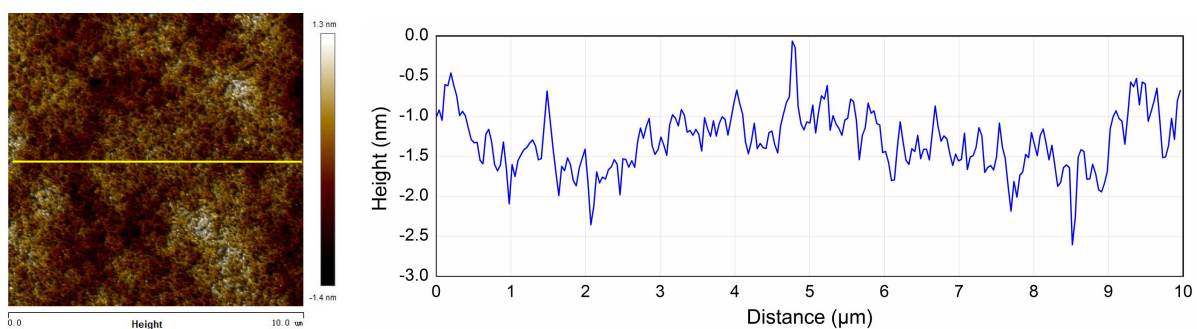

**Fig. S6** A two-dimensional topographic AFM image (left) and its surface cross-sectional profile (right) of one  $(\text{Br-C}_6\text{H}_4\text{-NH}_2)_2\text{CuBr}_2$  film along the yellow line.

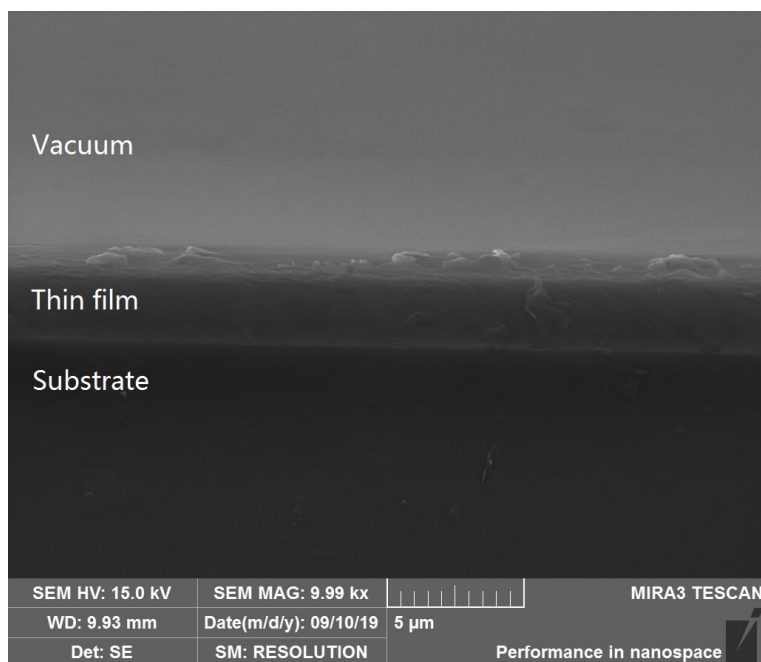

**Fig. S7** A cross-sectional SEM micrograph of one  $(\text{Br-C}_6\text{H}_4\text{-NH}_2)_2\text{CuBr}_2$  film.

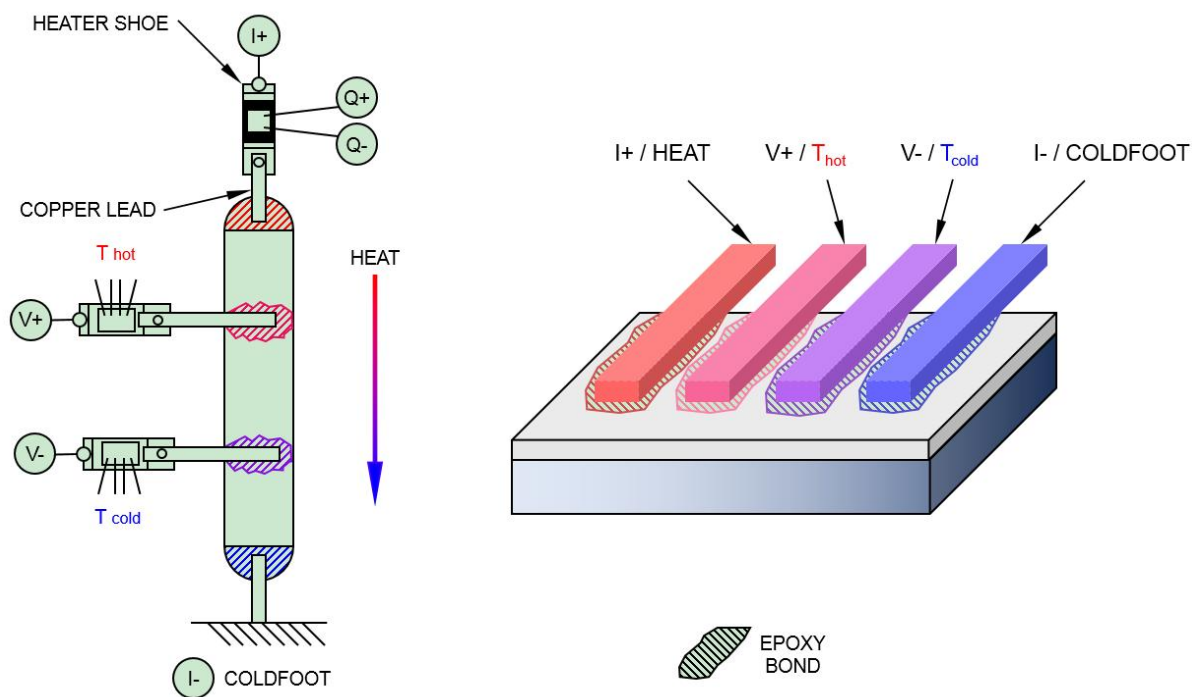

**Fig. S8** Schematic diagram of the measurements of thermoelectric properties via PPMS. Thermal and electrical connections for an idealized sample (left) and a real film sample (right). The sample is shown mounted in the four probe geometry.



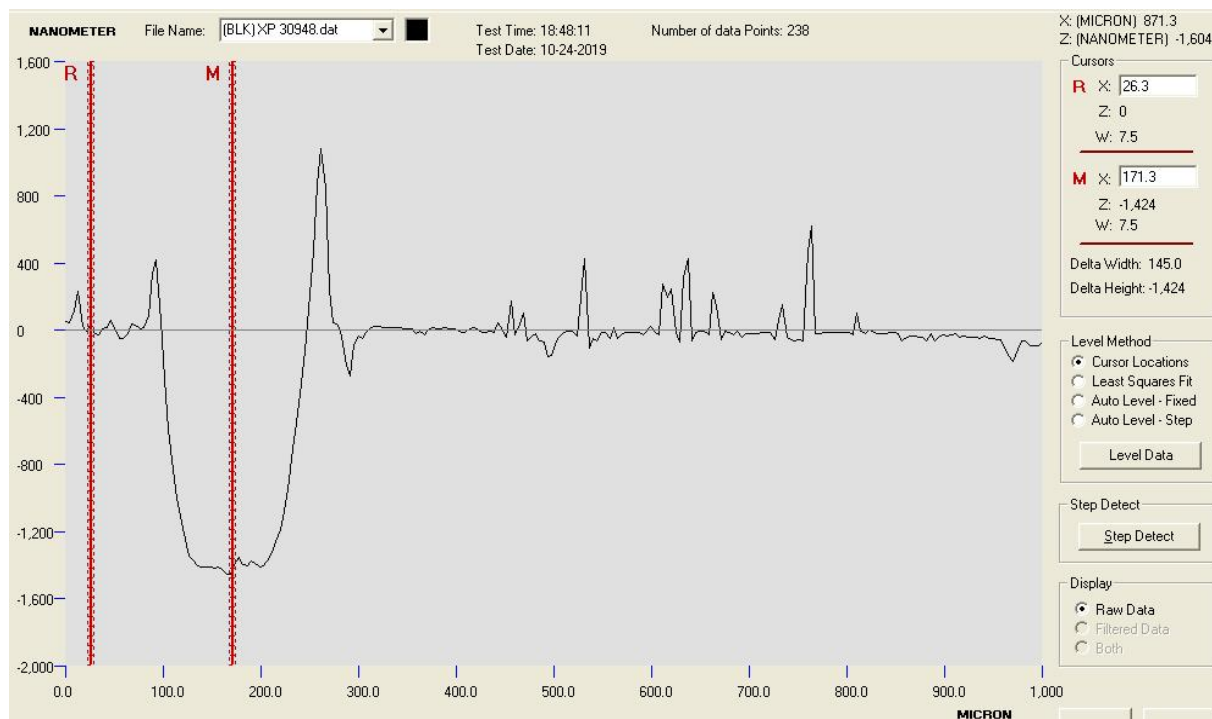

**Fig. S9** Thickness measurement data of the  $(\text{Br-C}_6\text{H}_4\text{-NH}_2)_2\text{CuBr}_2$  film.

**Table S1** Thermoelectric properties of one sample tested for 20 times at 298 K.

| Number  | $PF$<br>( $\mu\text{W K}^{-2} \text{m}^{-1}$ ) | $S$<br>( $\mu\text{V K}^{-1}$ ) | $ZT$               | $\kappa$<br>( $\text{W K}^{-1} \text{m}^{-1}$ ) | $\sigma$<br>( $\text{S cm}^{-1}$ ) |
|---------|------------------------------------------------|---------------------------------|--------------------|-------------------------------------------------|------------------------------------|
| 1       | 1589.116236                                    | -63.10078487                    | 0.126152272        | 3.753886609                                     | 3991.040569                        |
| 2       | 1589.245165                                    | -63.10350015                    | 0.126296403        | 3.749738743                                     | 3991.020892                        |
| 3       | 1588.868729                                    | -63.09662036                    | 0.126254473        | 3.750029543                                     | 3990.945730                        |
| 4       | 1588.915080                                    | -63.09687960                    | 0.125906668        | 3.760733193                                     | 3991.029359                        |
| 5       | 1588.917005                                    | -63.09674106                    | 0.125698232        | 3.767062753                                     | 3991.051721                        |
| 6       | 1588.613438                                    | -63.09108285                    | 0.125712198        | 3.765820881                                     | 3991.004975                        |
| 7       | 1589.038188                                    | -63.09944012                    | 0.126160695        | 3.753329445                                     | 3991.014659                        |
| 8       | 1589.097412                                    | -63.10103124                    | 0.126082597        | 3.756028246                                     | 3990.962128                        |
| 9       | 1588.465684                                    | -63.08810366                    | 0.125575943        | 3.769543443                                     | 3991.010685                        |
| 10      | 1589.268066                                    | -63.10415357                    | 0.126122252        | 3.754920726                                     | 3990.995751                        |
| 11      | 1589.278029                                    | -63.10380117                    | 0.125931005        | 3.761052019                                     | 3991.065344                        |
| 12      | 1588.582261                                    | -63.09069278                    | 0.125608393        | 3.768667925                                     | 3990.976001                        |
| 13      | 1589.058084                                    | -63.09996890                    | 0.125987018        | 3.758759390                                     | 3990.997738                        |
| 14      | 1589.075576                                    | -63.10004383                    | 0.126143980        | 3.754039276                                     | 3991.032192                        |
| 15      | 1588.776733                                    | -63.09399297                    | 0.125608766        | 3.769340041                                     | 3991.047025                        |
| 16      | 1588.617259                                    | -63.09085715                    | 0.125905400        | 3.760387580                                     | 3991.043129                        |
| 17      | 1588.569022                                    | -63.09042071                    | 0.125532834        | 3.771061318                                     | 3990.977159                        |
| 18      | 1589.422415                                    | -63.10735613                    | 0.125995484        | 3.759199075                                     | 3990.978257                        |
| 19      | 1588.752743                                    | -63.09342435                    | 0.125939392        | 3.759363850                                     | 3991.058699                        |
| 20      | 1589.275539                                    | -63.10413403                    | 0.125851336        | 3.763193093                                     | 3991.016988                        |
| Average | 1588.948 $\pm$ 0.283                           | -63.098 $\pm$ 0.006             | 0.126 $\pm$ 0.0002 | 3.760 $\pm$ 0.007                               | 3991.013 $\pm$ 0.034               |

**Table S2** Thermoelectric properties of one sample tested for 20 times at 313 K.

| Number  | $PF$<br>( $\mu\text{W K}^{-2} \text{m}^{-1}$ ) | $S$<br>( $\mu\text{V K}^{-1}$ ) | $ZT$         | $\kappa$<br>( $\text{W K}^{-1} \text{m}^{-1}$ ) | $\sigma$<br>( $\text{S cm}^{-1}$ ) |
|---------|------------------------------------------------|---------------------------------|--------------|-------------------------------------------------|------------------------------------|
| 1       | 1693.775103                                    | -67.61317644                    | 0.145899093  | 3.633636175                                     | 3705.041408                        |
| 2       | 1693.622191                                    | -67.61052016                    | 0.145452828  | 3.644460191                                     | 3704.998028                        |
| 3       | 1693.098416                                    | -67.59970207                    | 0.145753265  | 3.635760507                                     | 3705.037771                        |
| 4       | 1692.694151                                    | -67.59221205                    | 0.145030091  | 3.653177489                                     | 3704.974083                        |
| 5       | 1693.261135                                    | -67.60303059                    | 0.145255824  | 3.648721961                                     | 3705.028980                        |
| 6       | 1693.513301                                    | -67.60764321                    | 0.145628695  | 3.639944977                                     | 3705.075126                        |
| 7       | 1692.781487                                    | -67.59376104                    | 0.145228059  | 3.648546597                                     | 3704.99543                         |
| 8       | 1693.395751                                    | -67.60604070                    | 0.145994527  | 3.630416563                                     | 3704.993587                        |
| 9       | 1693.235825                                    | -67.60301559                    | 0.145324310  | 3.646934794                                     | 3704.975244                        |
| 10      | 1693.539899                                    | -67.60909123                    | 0.145596241  | 3.640703149                                     | 3704.974609                        |
| 11      | 1692.864335                                    | -67.59536479                    | 0.145113609  | 3.651268672                                     | 3705.000945                        |
| 12      | 1693.396826                                    | -67.60585828                    | 0.145603890  | 3.640411200                                     | 3705.015935                        |
| 13      | 1693.655657                                    | -67.61154351                    | 0.145413456  | 3.645511795                                     | 3704.959082                        |
| 14      | 1692.753320                                    | -67.59305425                    | 0.145579257  | 3.639501173                                     | 3705.011264                        |
| 15      | 1693.373886                                    | -67.60556526                    | 0.145639948  | 3.639348401                                     | 3704.997861                        |
| 16      | 1692.778118                                    | -67.59379104                    | 0.145342220  | 3.645518827                                     | 3704.984768                        |
| 17      | 1692.512003                                    | -67.58805980                    | 0.145149056  | 3.649863548                                     | 3705.030589                        |
| 18      | 1692.917508                                    | -67.59653114                    | 0.145344459  | 3.645655749                                     | 3704.989461                        |
| 19      | 1692.808314                                    | -67.59515983                    | 0.145357071  | 3.645119121                                     | 3704.900806                        |
| 20      | 1692.942124                                    | -67.59676654                    | 0.145943000  | 3.630873732                                     | 3705.017528                        |
| Average | 1693.146±0.376                                 | -67.601±0.007                   | 0.145±0.0003 | 3.643±0.007                                     | 3705.000±0.036                     |

**Table S3** Thermoelectric properties of one sample tested for 20 times at 328 K.

| Number  | $PF$<br>( $\mu\text{W K}^{-2} \text{m}^{-1}$ ) | $S$<br>( $\mu\text{V K}^{-1}$ ) | $ZT$         | $\kappa$<br>( $\text{W K}^{-1} \text{m}^{-1}$ ) | $\sigma$<br>( $\text{S cm}^{-1}$ ) |
|---------|------------------------------------------------|---------------------------------|--------------|-------------------------------------------------|------------------------------------|
| 1       | 1789.137222                                    | -71.71240029                    | 0.166333447  | 3.528025375                                     | 3479.005642                        |
| 2       | 1788.267455                                    | -71.69515622                    | 0.165423512  | 3.545791559                                     | 3478.987290                        |
| 3       | 1789.305479                                    | -71.71602247                    | 0.165674683  | 3.542523575                                     | 3478.981365                        |
| 4       | 1788.505871                                    | -71.70034422                    | 0.166396209  | 3.525535074                                     | 3478.947610                        |
| 5       | 1788.714469                                    | -71.70455209                    | 0.166161584  | 3.530740275                                     | 3478.945022                        |
| 6       | 1788.117371                                    | -71.69194283                    | 0.166020289  | 3.532817928                                     | 3479.007161                        |
| 7       | 1788.686386                                    | -71.70343618                    | 0.165901021  | 3.536279975                                     | 3478.998684                        |
| 8       | 1788.208120                                    | -71.69380264                    | 0.165821322  | 3.537060850                                     | 3479.003220                        |
| 9       | 1788.324200                                    | -71.69661819                    | 0.165293062  | 3.548625500                                     | 3478.955800                        |
| 10      | 1788.290371                                    | -71.69581055                    | 0.165265124  | 3.549296345                                     | 3478.968369                        |
| 11      | 1789.048239                                    | -71.71080327                    | 0.166129347  | 3.532157187                                     | 3478.987563                        |
| 12      | 1789.106804                                    | -71.71136652                    | 0.166794847  | 3.518087425                                     | 3479.046797                        |
| 13      | 1787.660447                                    | -71.68277826                    | 0.165408049  | 3.545101927                                     | 3479.007563                        |
| 14      | 1788.475055                                    | -71.69889007                    | 0.166334002  | 3.526754720                                     | 3479.028783                        |
| 15      | 1788.144500                                    | -71.69260611                    | 0.165944660  | 3.534332101                                     | 3478.995568                        |
| 16      | 1788.489886                                    | -71.69966151                    | 0.164781794  | 3.559963094                                     | 3478.982770                        |
| 17      | 1788.486524                                    | -71.69937746                    | 0.165233618  | 3.550241898                                     | 3479.003794                        |
| 18      | 1789.703079                                    | -71.72362250                    | 0.165319781  | 3.550841283                                     | 3479.017018                        |
| 19      | 1789.141608                                    | -71.71277168                    | 0.166014377  | 3.534896007                                     | 3478.978135                        |
| 20      | 1788.888079                                    | -71.70750013                    | 0.166218124  | 3.530014009                                     | 3478.996608                        |
| Average | 1788.635±0.494                                 | -71.702±0.010                   | 0.166±0.0005 | 3.538±0.011                                     | 3478.992±0.026                     |

**Table S4** Thermoelectric properties of one sample tested for 20 times at 343 K.

| Number  | $PF$<br>( $\mu\text{W K}^{-2} \text{m}^{-1}$ ) | $S$<br>( $\mu\text{V K}^{-1}$ ) | $ZT$         | $\kappa$<br>( $\text{W K}^{-1} \text{m}^{-1}$ ) | $\sigma$<br>( $\text{S cm}^{-1}$ ) |
|---------|------------------------------------------------|---------------------------------|--------------|-------------------------------------------------|------------------------------------|
| 1       | 1804.110784                                    | -76.45956837                    | 0.183354275  | 3.374897861                                     | 3086.025558                        |
| 2       | 1803.841850                                    | -76.45426834                    | 0.183156094  | 3.378036464                                     | 3085.993348                        |
| 3       | 1804.350560                                    | -76.46507514                    | 0.183046005  | 3.380972456                                     | 3085.991172                        |
| 4       | 1804.865810                                    | -76.47624389                    | 0.182939562  | 3.384191635                                     | 3085.970848                        |
| 5       | 1804.071701                                    | -76.45905378                    | 0.182952182  | 3.382418143                                     | 3086.000243                        |
| 6       | 1803.519702                                    | -76.44776494                    | 0.182645821  | 3.386971281                                     | 3085.967198                        |
| 7       | 1804.970410                                    | -76.47799517                    | 0.182733335  | 3.387979088                                     | 3086.008354                        |
| 8       | 1804.898528                                    | -76.47608398                    | 0.182581057  | 3.390631468                                     | 3086.039695                        |
| 9       | 1804.328962                                    | -76.46427357                    | 0.182584371  | 3.389573941                                     | 3086.018934                        |
| 10      | 1803.988583                                    | -76.45703900                    | 0.182975889  | 3.381732613                                     | 3086.020701                        |
| 11      | 1803.967301                                    | -76.45708033                    | 0.183106144  | 3.379219002                                     | 3085.980959                        |
| 12      | 1803.856449                                    | -76.45430097                    | 0.182623420  | 3.387924307                                     | 3086.015690                        |
| 13      | 1804.461939                                    | -76.46848178                    | 0.182917115  | 3.383737422                                     | 3085.906695                        |
| 14      | 1803.968614                                    | -76.45651931                    | 0.182595969  | 3.388568226                                     | 3086.028493                        |
| 15      | 1804.331005                                    | -76.46387949                    | 0.182405342  | 3.392840764                                     | 3086.054238                        |
| 16      | 1804.456194                                    | -76.46725566                    | 0.182403394  | 3.393304068                                     | 3085.995834                        |
| 17      | 1804.283581                                    | -76.46373455                    | 0.182590515  | 3.389336225                                     | 3085.984824                        |
| 18      | 1803.992930                                    | -76.45783504                    | 0.182160622  | 3.396913825                                     | 3085.963879                        |
| 19      | 1803.909989                                    | -76.45558345                    | 0.183454030  | 3.372818792                                     | 3086.003753                        |
| 20      | 1804.098298                                    | -76.45958812                    | 0.182297600  | 3.394465487                                     | 3086.002606                        |
| Average | 1804.214±0.380                                 | -76.462±0.008                   | 0.183±0.0003 | 3.386±0.007                                     | 3085.999±0.032                     |

**Table S5** Thermoelectric properties of one sample tested for 20 times at 358 K.

| Number  | $PF$<br>( $\mu\text{W K}^{-2} \text{m}^{-1}$ ) | $S$<br>( $\mu\text{V K}^{-1}$ ) | $ZT$         | $\kappa$<br>( $\text{W K}^{-1} \text{m}^{-1}$ ) | $\sigma$<br>( $\text{S cm}^{-1}$ ) |
|---------|------------------------------------------------|---------------------------------|--------------|-------------------------------------------------|------------------------------------|
| 1       | 1970.289090                                    | -82.24261641                    | 0.218710034  | 3.225001081                                     | 2912.970699                        |
| 2       | 1970.793134                                    | -82.25287258                    | 0.218807596  | 3.224572736                                     | 2912.989321                        |
| 3       | 1971.642835                                    | -82.26985151                    | 0.219203122  | 3.220096222                                     | 2913.042480                        |
| 4       | 1971.259422                                    | -82.26287528                    | 0.219392458  | 3.216617448                                     | 2912.970000                        |
| 5       | 1970.685812                                    | -82.25014382                    | 0.218662978  | 3.226565973                                     | 2913.023967                        |
| 6       | 1970.599521                                    | -82.24948383                    | 0.219325095  | 3.216537147                                     | 2912.943161                        |
| 7       | 1970.695194                                    | -82.25139979                    | 0.218810547  | 3.224258559                                     | 2912.948873                        |
| 8       | 1970.917033                                    | -82.25549305                    | 0.218403395  | 3.230555184                                     | 2912.986842                        |
| 9       | 1970.466736                                    | -82.24582692                    | 0.219514746  | 3.213468256                                     | 2913.005904                        |
| 10      | 1970.616030                                    | -82.24854315                    | 0.217791092  | 3.239296521                                     | 2913.034198                        |
| 11      | 1971.022132                                    | -82.25712748                    | 0.218704541  | 3.226302066                                     | 2913.026411                        |
| 12      | 1971.240393                                    | -82.26186860                    | 0.218682346  | 3.227050461                                     | 2913.013175                        |
| 13      | 1970.877924                                    | -82.25393962                    | 0.218466305  | 3.229506814                                     | 2913.039067                        |
| 14      | 1970.817331                                    | -82.25335377                    | 0.218258171  | 3.232524916                                     | 2912.991002                        |
| 15      | 1970.453396                                    | -82.24564359                    | 0.218414813  | 3.229684624                                     | 2912.999169                        |
| 16      | 1970.383270                                    | -82.24397481                    | 0.219690394  | 3.210931993                                     | 2913.013710                        |
| 17      | 1971.105880                                    | -82.25878408                    | 0.218472438  | 3.229940834                                     | 2913.032851                        |
| 18      | 1970.751017                                    | -82.25188472                    | 0.219060305  | 3.220703649                                     | 2912.997038                        |
| 19      | 1970.247184                                    | -82.24162414                    | 0.218273072  | 3.231493543                                     | 2912.979034                        |
| 20      | 1970.613386                                    | -82.24900828                    | 0.219933509  | 3.207812302                                     | 2912.997341                        |
| Average | 1970.774±0.353                                 | -82.252±0.007                   | 0.219±0.0005 | 3.224±0.008                                     | 2913.000±0.029                     |



**Table S6** Thermoelectric properties of one sample tested for 20 times at 373 K.

| Number  | $PF$<br>( $\mu\text{W K}^{-2} \text{m}^{-1}$ ) | $S$<br>( $\mu\text{V K}^{-1}$ ) | $ZT$         | $\kappa$<br>( $\text{W K}^{-1} \text{m}^{-1}$ ) | $\sigma$<br>( $\text{S cm}^{-1}$ ) |
|---------|------------------------------------------------|---------------------------------|--------------|-------------------------------------------------|------------------------------------|
| 1       | 2003.719619                                    | -84.97356900                    | 0.245645148  | 3.042473680                                     | 2775.039896                        |
| 2       | 2003.596785                                    | -84.97098994                    | 0.246379359  | 3.033469654                                     | 2775.038229                        |
| 3       | 2003.271414                                    | -84.96517481                    | 0.245223309  | 3.046987800                                     | 2774.967387                        |
| 4       | 2003.184724                                    | -84.96348976                    | 0.246239741  | 3.034410736                                     | 2774.957368                        |
| 5       | 2003.126089                                    | -84.96123927                    | 0.244405355  | 3.056993437                                     | 2775.023149                        |
| 6       | 2003.455833                                    | -84.96883586                    | 0.245304620  | 3.04640722                                      | 2774.983700                        |
| 7       | 2004.417036                                    | -84.98826355                    | 0.246694869  | 3.030692921                                     | 2775.045916                        |
| 8       | 2002.969819                                    | -84.95884456                    | 0.245595160  | 3.042074573                                     | 2774.963088                        |
| 9       | 2003.687323                                    | -84.97341603                    | 0.248367282  | 3.009209998                                     | 2775.005160                        |
| 10      | 2003.230679                                    | -84.96514009                    | 0.245655732  | 3.041631938                                     | 2774.913227                        |
| 11      | 2003.767544                                    | -84.97536574                    | 0.245755907  | 3.041193923                                     | 2774.988916                        |
| 12      | 2003.681333                                    | -84.97357198                    | 0.246151270  | 3.036303485                                     | 2774.986679                        |
| 13      | 2002.611483                                    | -84.95082386                    | 0.246147707  | 3.034654200                                     | 2774.990572                        |
| 14      | 2003.461583                                    | -84.96820530                    | 0.245997226  | 3.037882131                                     | 2775.032852                        |
| 15      | 2003.857210                                    | -84.97711594                    | 0.246828016  | 3.028103466                                     | 2774.998782                        |
| 16      | 2003.655088                                    | -84.97329558                    | 0.246025938  | 3.037651519                                     | 2774.968383                        |
| 17      | 2003.370486                                    | -84.96775284                    | 0.245340113  | 3.045881101                                     | 2774.936224                        |
| 18      | 2003.500923                                    | -84.96957587                    | 0.246159064  | 3.035896604                                     | 2774.997817                        |
| 19      | 2003.108695                                    | -84.96164133                    | 0.246431697  | 3.031897662                                     | 2774.972787                        |
| 20      | 2003.289975                                    | -84.96557836                    | 0.246048807  | 3.036996185                                     | 2774.966738                        |
| Average | 2003.448±0.383                                 | -84.969±0.008                   | 0.246±0.0008 | 3.038±0.009                                     | 2774.989±0.035                     |

**Table S7** Thermoelectric properties of one sample tested for 20 times at 388 K.

| Number  | $PF$<br>( $\mu\text{W K}^{-2} \text{m}^{-1}$ ) | $S$<br>( $\mu\text{V K}^{-1}$ ) | $ZT$         | $\kappa$<br>( $\text{W K}^{-1} \text{m}^{-1}$ ) | $\sigma$<br>( $\text{S cm}^{-1}$ ) |
|---------|------------------------------------------------|---------------------------------|--------------|-------------------------------------------------|------------------------------------|
| 1       | 2026.650944                                    | -88.15317234                    | 0.268968895  | 2.923600543                                     | 2607.972838                        |
| 2       | 2026.695078                                    | -88.15311655                    | 0.268800887  | 2.925419993                                     | 2608.032932                        |
| 3       | 2027.524050                                    | -88.17162944                    | 0.268264336  | 2.932452100                                     | 2608.004166                        |
| 4       | 2027.393116                                    | -88.16959698                    | 0.270236552  | 2.910872457                                     | 2607.955977                        |
| 5       | 2026.642068                                    | -88.15282779                    | 0.268528497  | 2.928316923                                     | 2607.981802                        |
| 6       | 2027.662698                                    | -88.17500817                    | 0.268427807  | 2.930966049                                     | 2607.982630                        |
| 7       | 2026.828929                                    | -88.15601129                    | 0.269947556  | 2.913190558                                     | 2608.033891                        |
| 8       | 2027.035679                                    | -88.16010431                    | 0.267839384  | 2.936498529                                     | 2608.057742                        |
| 9       | 2026.403813                                    | -88.14769639                    | 0.269230980  | 2.920325577                                     | 2607.978818                        |
| 10      | 2026.722753                                    | -88.15449163                    | 0.267195553  | 2.943208637                                     | 2607.987182                        |
| 11      | 2026.565898                                    | -88.15147947                    | 0.269004635  | 2.922891073                                     | 2607.963562                        |
| 12      | 2026.834506                                    | -88.15538978                    | 0.269102449  | 2.922279605                                     | 2608.077841                        |
| 13      | 2027.230346                                    | -88.16505011                    | 0.269891675  | 2.914413597                                     | 2608.015579                        |
| 14      | 2026.717940                                    | -88.15331848                    | 0.268861120  | 2.924733041                                     | 2608.050403                        |
| 15      | 2027.052372                                    | -88.16221999                    | 0.268425474  | 2.929949743                                     | 2607.954046                        |
| 16      | 2027.122151                                    | -88.16383888                    | 0.267988483  | 2.934784436                                     | 2607.948043                        |
| 17      | 2026.837347                                    | -88.15685495                    | 0.269169806  | 2.921659571                                     | 2607.994806                        |
| 18      | 2026.713749                                    | -88.15391905                    | 0.269585196  | 2.917023263                                     | 2608.009474                        |
| 19      | 2026.473569                                    | -88.14864047                    | 0.267688147  | 2.937306842                                     | 2608.012729                        |
| 20      | 2027.009706                                    | -88.16045989                    | 0.267964838  | 2.935023185                                     | 2608.003286                        |
| Average | 2026.906±0.344                                 | -88.158±0.008                   | 0.269±0.0008 | 2.926±0.009                                     | 2608.001±0.036                     |

**Table S8** Summary of thermoelectric properties for representative n-type organic thermoelectric materials at room temperature.

| Type                                       | Materials                                                                           | $\sigma$<br>(S cm <sup>-1</sup> ) | $PF$<br>( $\mu$ W m <sup>-1</sup> K <sup>-2</sup> ) | $ZT$  | Reference |
|--------------------------------------------|-------------------------------------------------------------------------------------|-----------------------------------|-----------------------------------------------------|-------|-----------|
| Conjugated polymer                         | FBDPPV doped with (N-DMBI) <sub>2</sub>                                             | 7.2                               | 7                                                   | —     | [7]       |
|                                            | PDTz doped with TP-DMBI                                                             | 11                                | 15                                                  | —     | [8]       |
|                                            | P(PzDPP-CT2) doped with N-DMBI                                                      | 6.0                               | 57.3                                                | —     | [9]       |
|                                            | CIBDPPV doped with TBAF                                                             | 0.62                              | 0.63                                                | —     | [10]      |
|                                            | PNDTI-BTT-PD doped with N-DMBI                                                      | 5                                 | 14                                                  | —     | [11]      |
|                                            | PNDICITVT doped with NDI-TBAF                                                       | 0.2                               | 67                                                  | —     | [12]      |
|                                            | P(PymPh) doped with NaNap                                                           | 18                                | 0.485                                               | —     | [13]      |
|                                            | PDPF doped with 5wt% N-DMBI                                                         | 1.3                               | 4.65                                                | —     | [14]      |
| Metal-organic coordination small molecular | (Br-C <sub>6</sub> H <sub>4</sub> -NH <sub>2</sub> ) <sub>2</sub> CuBr <sub>2</sub> | 3991                              | 1588.95                                             | 0.13  | This work |
|                                            | (DMDCNQI) <sub>2</sub> Cu                                                           | 1000                              | 116                                                 | —     | [15]      |
|                                            | (DMe-DCNQI) <sub>2</sub> Cu                                                         | 1000                              | 110                                                 | —     | [16]      |
|                                            | TTF[Ni(dmit) <sub>2</sub> ] <sub>2</sub> (crystal)                                  | 300                               | 29                                                  | —     | [17]      |
| Small molecular                            | (TTM-TTP)(I <sub>3</sub> ) <sub>5/3</sub>                                           | 250                               | 76                                                  | —     | [18]      |
|                                            | Bi-doped TDPPQ                                                                      | 3.3                               | 113                                                 | —     | [19]      |
|                                            | PTEG-2                                                                              | 8.35                              | 46                                                  | 0.15  | [20]      |
|                                            | PTEG-1 doped with N-DMBI                                                            | 2.05                              | 16.7                                                | —     | [21]      |
|                                            | 2DQTT- <i>o</i> -OD doped with (2-Cyc-DMBI-Me) <sub>2</sub>                         | N/A                               | 17.2                                                | 0.02  | [22]      |
|                                            | C60 doped with Cs <sub>2</sub> CO <sub>3</sub>                                      | 8.6                               | 20.5                                                | —     | [23]      |
|                                            | PCBM doped with N-DMBI                                                              | 40                                | 35                                                  | —     | [24]      |
|                                            | PCBM doped with AOB and N-DMBI                                                      | 2                                 | 1                                                   | —     | [25]      |
|                                            | TTF-TCNQ (crystal)                                                                  | 500                               | 39.2                                                | —     | [26]      |
|                                            | PDI-3                                                                               | 0.5                               | 1.4                                                 | —     | [27]      |
|                                            | 2DQQT-Se                                                                            | 0.29                              | 1.4                                                 | —     | [28]      |
|                                            | Q-DCM-DPPTT doped with N-DMBI                                                       | 0.11                              | 1.7                                                 | —     | [29]      |
| A-DCV-DPPTT doped with N-DMBI              | 3.1                                                                                 | 105                               | 0.11                                                | [29]  |           |
| 2DQQT doped with N-DMBI                    | 14                                                                                  | 41.6                              | 0.03                                                | [30]  |           |
| Metal-organic coordination polymer         | Poly[K <sub>x</sub> (Ni-ett)] film                                                  | 223                               | 453                                                 | 0.21  | [31]      |
|                                            | Poly[K <sub>x</sub> (Ni-ett)] compressed cuboid                                     | 45                                | 66                                                  | 0.096 | [32]      |
|                                            | Poly[Na <sub>x</sub> (Ni-ett)] compressed cuboid                                    | 41                                | 28                                                  | 0.042 | [32]      |

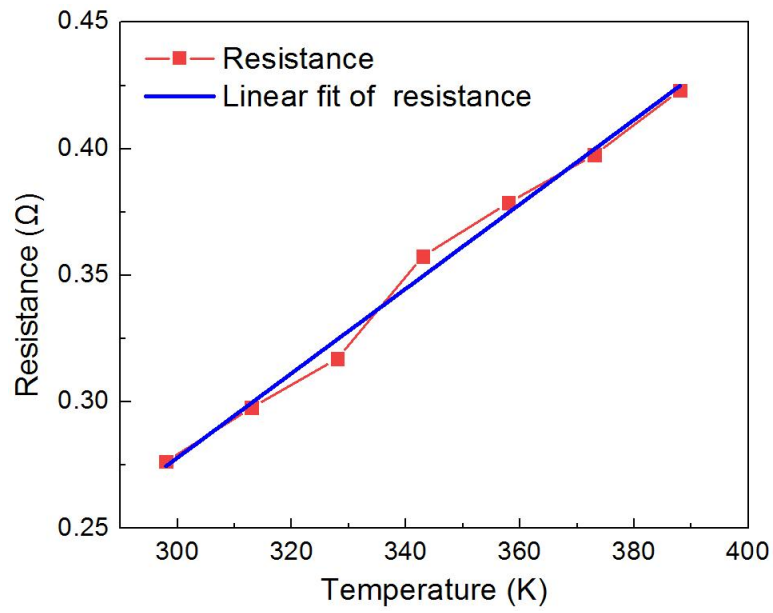

**Fig. S10** Resistance at different temperature of a  $(\text{Br-C}_6\text{H}_4\text{-NH}_2)_2\text{CuBr}_2$  film.

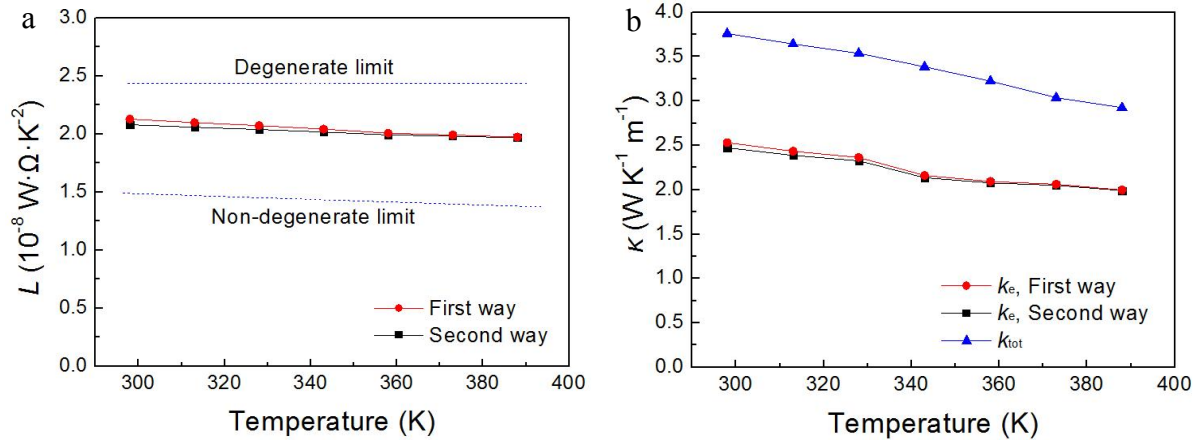

**Fig. S11** (a) Lorenz number that calculated via two ways and correspondent (b) electrical thermal conductivity of  $(\text{Br-C}_6\text{H}_4\text{-NH}_2)_2\text{CuBr}_2$  material.

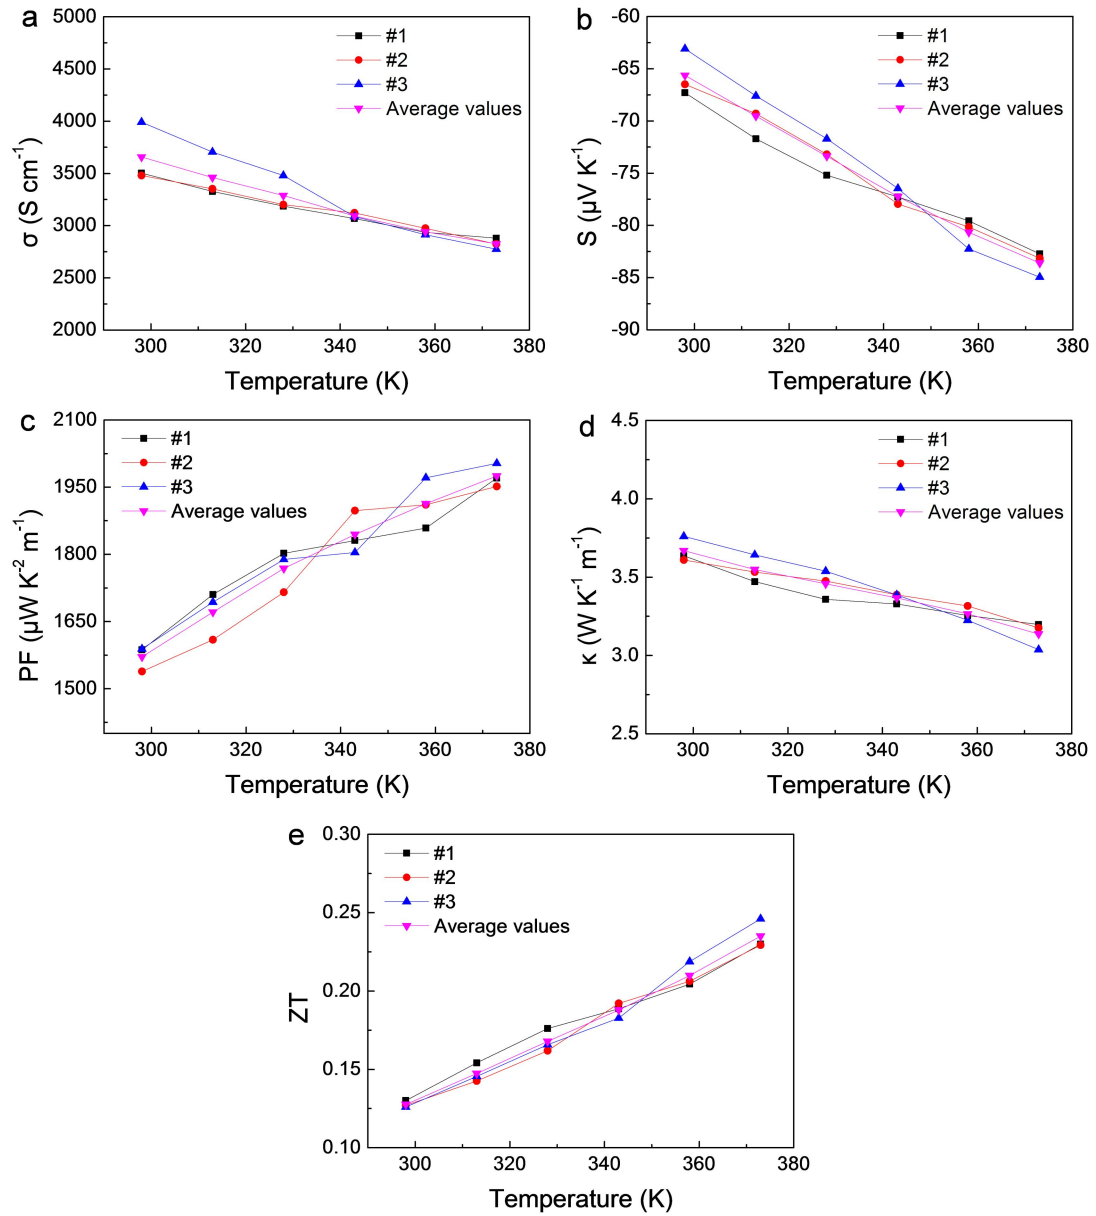

**Fig. S12** The reproducibility of thermoelectric properties for three different samples tested from 298 K to 373 K. The sample #3 shows the highest performance.

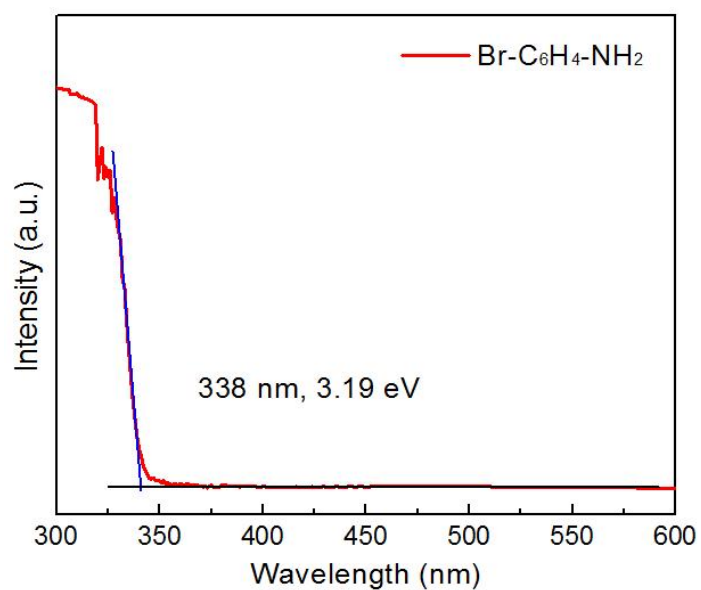

**Fig. S13** UV-Vis-NIR absorption spectrum of Br-C<sub>6</sub>H<sub>4</sub>-NH<sub>2</sub> powders. The bandgap is estimated by the equation  $E_g = 1240 / \lambda_{\text{edge}}$  ( $\lambda_{\text{edge}}$  is the threshold of absorption wavelength).

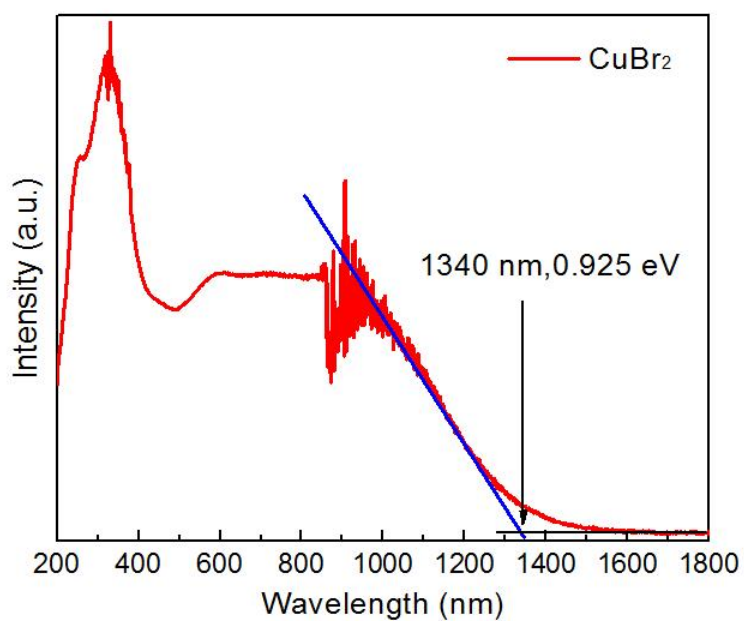

**Fig. S14** UV-Vis-NIR absorption spectrum of CuBr<sub>2</sub> powders. The bandgap is estimated by the equation  $E_g = 1240 / \lambda_{\text{edge}}$  ( $\lambda_{\text{edge}}$  is the threshold of absorption wavelength).



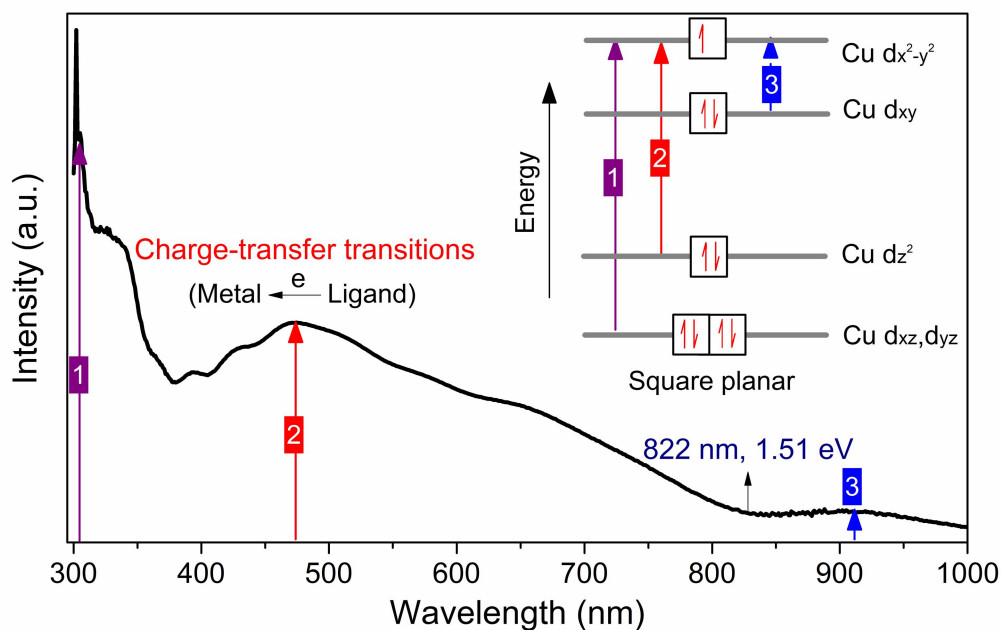

**Fig. S15** UV-Vis-NIR absorption spectrum of a  $(\text{Br-C}_6\text{H}_4\text{-NH}_2)_2\text{CuBr}_2$  film. The bandgap is estimated by the equation  $E_g = 1240 / \lambda_{\text{edge}}$  ( $\lambda_{\text{edge}}$  is the threshold of absorption wavelength). The inset is a diagram of the metal-to-ligand charge transfer (MLCT) transitions 1 and 2 for  $(\text{Br-C}_6\text{H}_4\text{-NH}_2)_2\text{CuBr}_2$ .

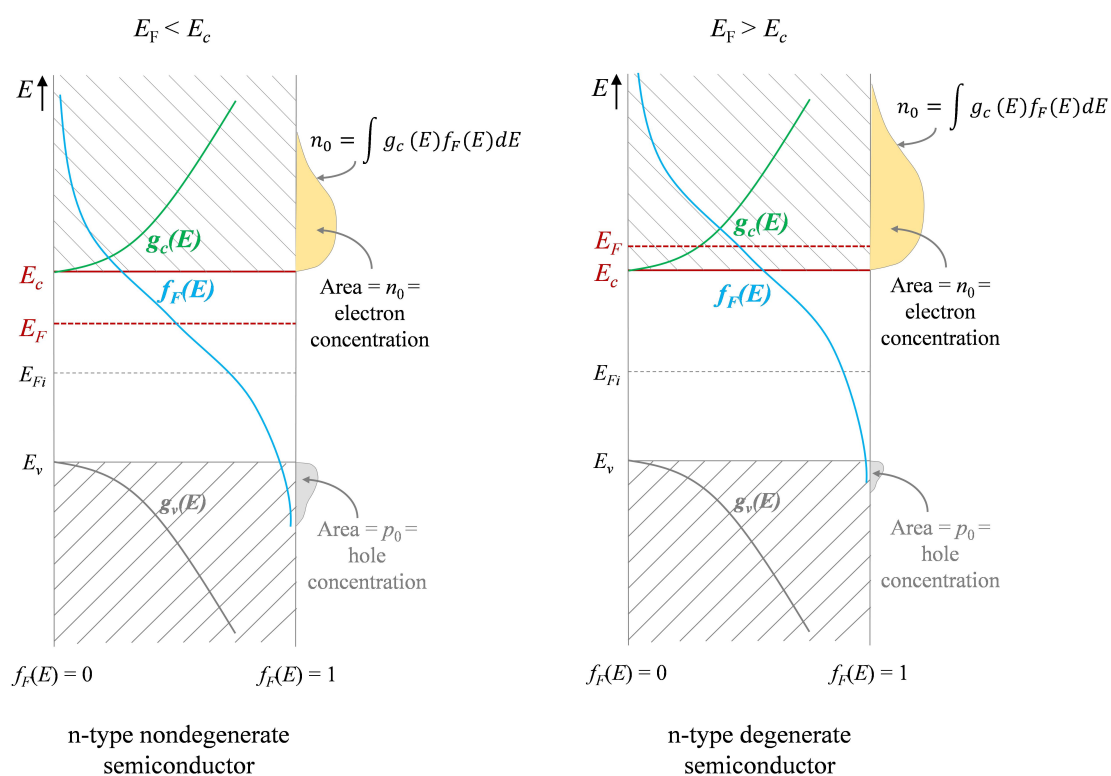

**Fig. S16** Density of states functions  $g_c(E)$ , Fermi-Dirac probability function  $f_F(E)$ , and areas representing electron and hole concentrations for the case when  $E_F$  is above the intrinsic Fermi energy  $E_{Fi}$ .

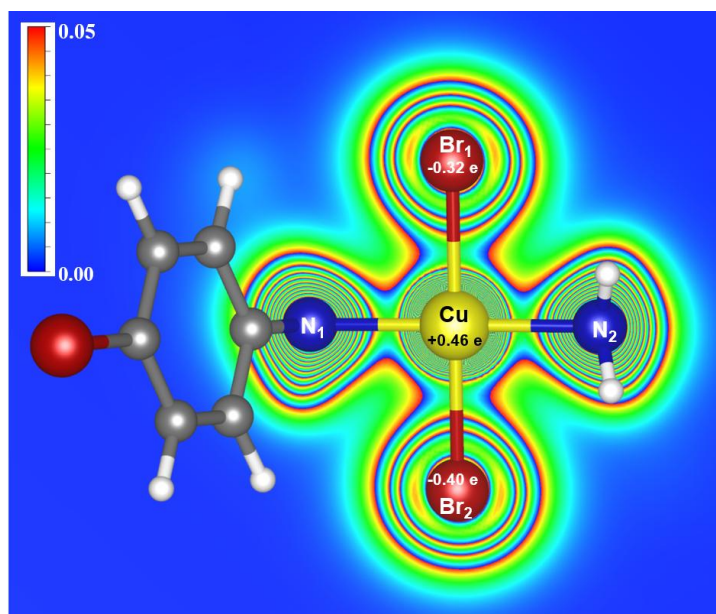

**Fig. S17** Bader charge analysis and 2D charge density map for  $(\text{Br-C}_6\text{H}_4\text{-NH}_2)_2\text{CuBr}_2$ .

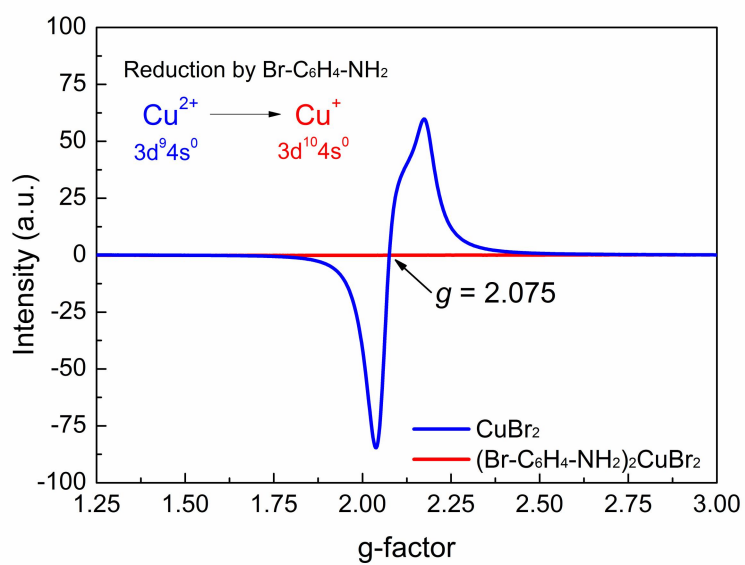

**Fig. S18** Electron paramagnetic resonance (EPR) spectra of  $\text{CuBr}_2$  and  $(\text{Br-C}_6\text{H}_4\text{-NH}_2)_2\text{CuBr}_2$ .

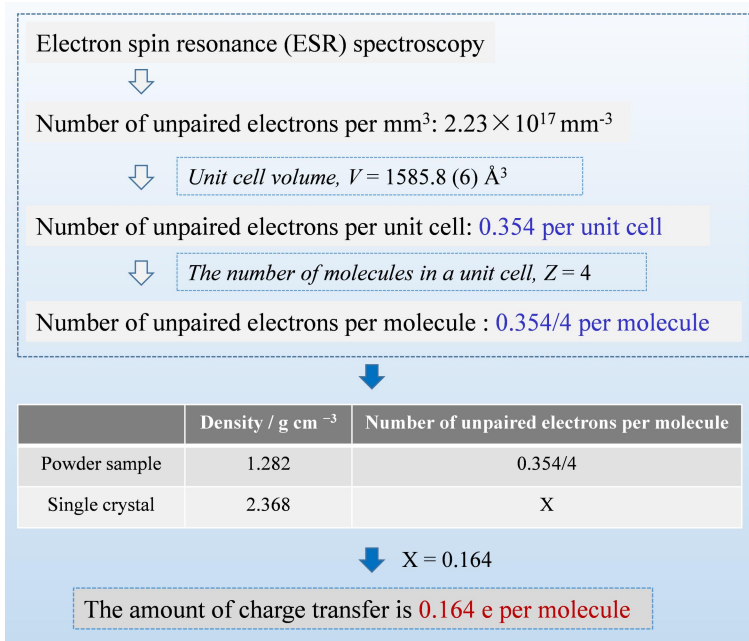

**Fig. S19** The detailed calculation process of the amount of charge transfer per  $(\text{Br-C}_6\text{H}_4\text{-NH}_2)_2\text{CuBr}_2$  molecule.

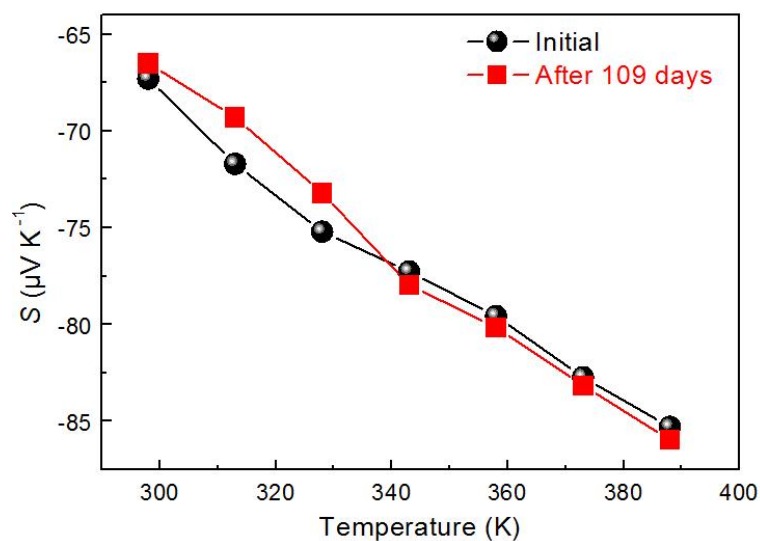

**Fig. S20** Seebeck coefficient of the  $(\text{Br-C}_6\text{H}_4\text{-NH}_2)_2\text{CuBr}_2$  film before and after storage in ambient air (relative humidity of  $50 \pm 20\%$ , room temperature) for 109 days.

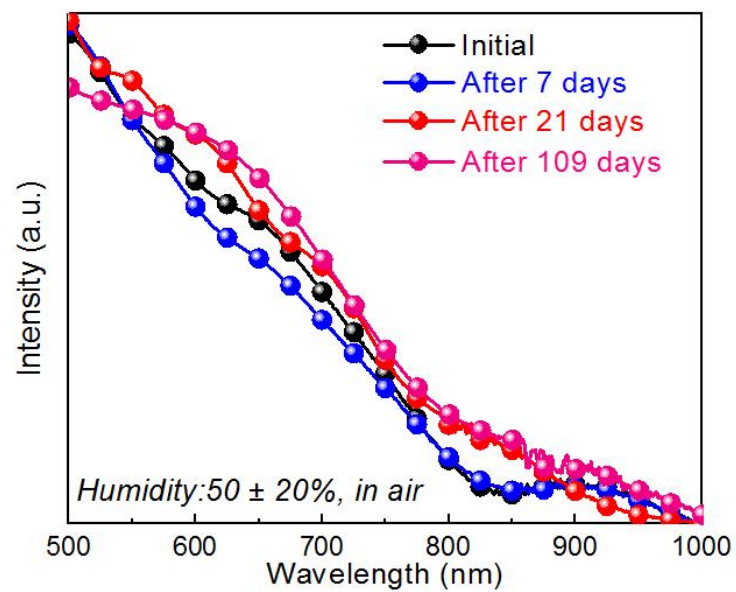

**Fig. S21** UV-Vis-NIR spectra of the  $(\text{BrC}_6\text{H}_4\text{NH}_2)_2\text{CuBr}_2$  film before and after storage in ambient air (relative humidity of  $50 \pm 20\%$ , room temperature) for 7, 21, and 109 days.

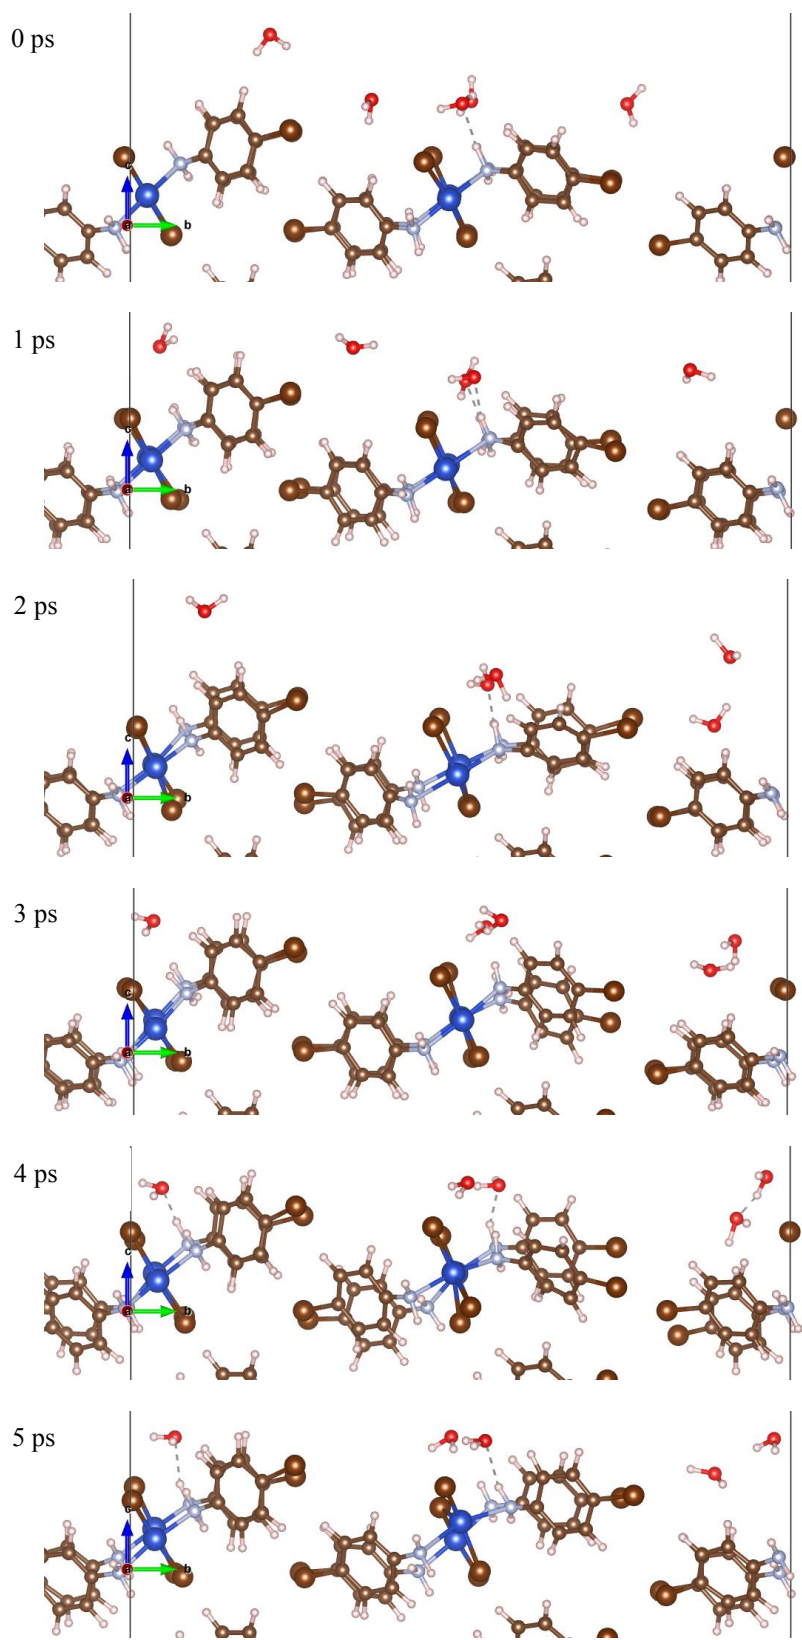

**Fig. S22** Snapshots of AIMD simulation at 0, 1, 2, 3, 4, 5 ps for the  $(\text{BrC}_6\text{H}_4\text{NH}_2)_2\text{CuBr}_2$  systems with five  $\text{H}_2\text{O}$  molecules. The gray dotted lines represents hydrogen bonds ( $\text{N}-\text{H}\cdots\text{O}$ ).

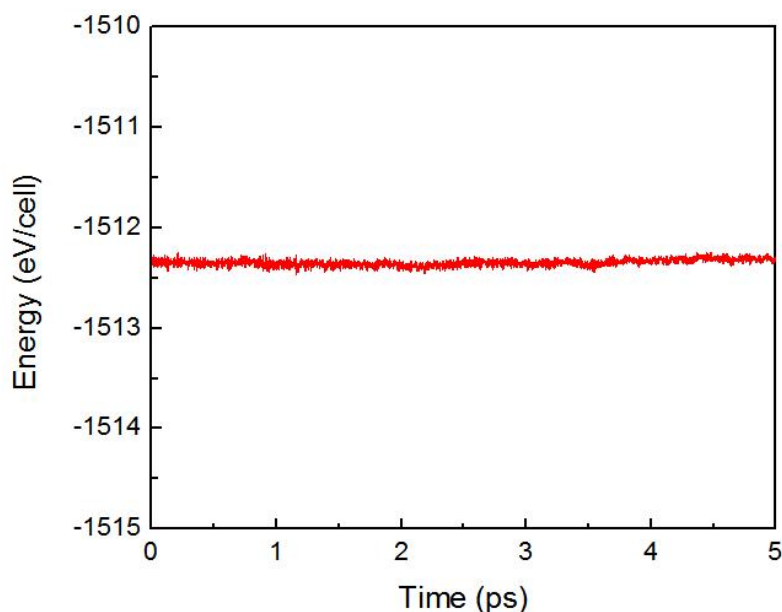

**Fig. S23** The AIMD total energy of  $(\text{BrC}_6\text{H}_4\text{NH}_2)_2\text{CuBr}_2$  during the heating process at 300 K from its initial configuration.

## REFERENCES

1. G. Kresse, J. Hafner, *Phys. Rev. B* 1993, **47**, 558.
2. G. Kresse, J. Furthmuller, *Phys. Rev. B* 1996, **54**, 11169.
3. G. Kresse, D. Joubert, *Phys. Rev. B* 1999, **59**, 1758–1775.
4. D. M. Rowe, C. M. Bhandari. *Modern Thermoelectrics*, Holt, Rinehart and Winston, 1993.
5. W.-T. Chiu, C.-L. Chen and Y.-Y. Chen, *Sci. Rep.*, 2016, **6**, 23143.
6. H.-S. Kim, Z. M. Gibbs, Y. Tang, H. Wang and G. J. Snyder, *APL Mater.*, 2015, **3**, 041506.
7. H.I. Un, S.A. Gregory, S.K. Mohapatra, M. Xiong, E. Longhi, Y. Lu, S. Rigin, S. Jhulki, C.Y. Yang, T.V. Timofeeva, et al. *Adv. Energy Mater.* 2019, **9**, 1900817.
8. J. Han, A. Chiu, C. Ganley, P. McGuiggan, S.M. Thon, P. Clancy, and H.E. Katz, *Angew. Chem. Int. Ed.* 2021, **60**, 27212.
9. X. Yan, M. Xiong, J.T. Li, S. Zhang, Z. Ahmad, Y. Lu, Z.Y. Wang, Z.F. Yao, J.Y. Wang, X. Gu, and T. Lei, *J. Am. Chem. Soc.* 2019, **141**, 20215–20221.
10. X. Zhao, D. Madan, Y. Cheng, J. Zhou, H. Li, S.M. Thon, A.E. Bragg, M.E. DeCoster, P.E. Hopkins, and H.E. Katz, *Adv. Mater.* 2017, **29**, 1606928.
11. Y. Wang, M. Nakano, T. Michinobu, Y. Kiyota, T. Mori, and K. Takimiya, *Macromolecules* 2017, **50**, 857–864.
12. J. Han, C. Ganley, Q. Hu, X. Zhao, P. Clancy, T.P. Russell, and H.E. Katz, *Adv. Funct. Mater.* 2021, **31**, 2010567.
13. S. Hwang, W.J. Potscavage, Y.S. Yang, I.S. Park, T. Matsushima, and C. Adachi, *Phys. Chem. Chem. Phys.* 2016, **18**, 29199–29207.
14. C.Y. Yang, W.L. Jin, J. Wang, Y.F. Ding, S. Nong, K. Shi, Y. Lu, Y.Z. Dai, F.D. Zhuang, T. Lei, et al.



- Adv. Mater.* 2018, **30**, 1802850.
15. T. Mori, H. Inokuchi, A. Kobayashi, R. Kato, and H. Kobayashi, *Phys. Rev. B. Condens. Matter.* 1988, **38**, 5913–5923.
  16. F. Huewe, A. Steeger, K. Kostova, L. Burroughs, I. Bauer, P. Strohriegl, V. Dimitrov, S. Woodward, and J. Pflaum, *Adv. Mater.* 2017, **29**, 1605682.
  17. R. Sato, Y. Kiyota, T. Kadoya, T. Kawamoto, and T. Mori, *RSC Adv.* 2016, **6**, 41040–41044.
  18. T. Mori, Y. Misaki, and T. Yamabe, *Bull. Chem. Soc. Jpn.* 1997, **70**, 1809–1812.
  19. D. Huang, C. Wang, Y. Zou, X. Shen, Y. Zang, H. Shen, X. Gao, Y. Yi, W. Xu, C.A. Di, and D. Zhu, *Angew. Chem. Int. Ed.* 2016, **55**, 10672–10675.
  20. J. Liu, B. van der Zee, R. Alessandri, S. Sami, J. Dong, M. I. Nugraha, A. J. Barker, S. Rousseva, L. Qiu, X. Qiu, N. Klasen, R. C. Chiechi, D. Baran, M. Caironi, T. D. Anthopoulos, G. Portale, R. W. A. Havenith, S. J. Marrink, J. C. Hummelen and L. J. A. Koster, *Nat. Commun.* 2020, **11**, 5694.
  21. J. Liu, L. Qiu, G. Portale, M. Koopmans, G. Ten Brink, J.C. Hummelen, and L.J.A. Koster, *Adv. Mater.* 2017, **29**, 1701641.
  22. D. Yuan, D. Huang, C. Zhang, Y. Zou, C.A. Di, X. Zhu, and D. Zhu, *ACS Appl. Mater. Interfaces* 2017, **9**, 28795–28801.
  23. M. Sumino, K. Harada, M. Ikeda, S. Tanaka, K. Miyazaki, and C. Adachi, *Appl. Phys. Lett.* 2011, **99**, 093308.
  24. G. Zuo, Z. Li, E. Wang, and M. Kemerink, *Adv. Electron. Mater.* 2018, **4**, 1700501.
  25. F. Gao, Y. Liu, Y. Xiong, P. Wu, B. Hu, and L. Xu, *Front. Optoelectron.* 2017, **10**, 117–123.
  26. P.M. Chaikin, R.L. Greene, S. Etemad, and E. Engler, *Phys. Rev. B* 1976, **13**, 1627–1632.
  27. B. Russ, M.J. Robb, F.G. Brunetti, P.L. Miller, E.E. Perry, S.N. Patel, V. Ho, W.B. Chang, J.J. Urban, M.L. Chabinyk, et al. *Adv. Mater.* 2014, **26**, 3473–3477.
  28. D. Yuan, Y. Guo, Y. Zeng, Q. Fan, J. Wang, Y. Yi and X. Zhu, *Angew. Chem. Int. Ed.* 2019, **58**, 4958–4962.
  29. D. Huang, H. Yao, Y. Cui, Y. Zou, F. Zhang, C. Wang, H. Shen, W. Jin, J. Zhu, Y. Diao, W. Xu, C. A. Di and D. Zhu, *J. Am. Chem. Soc.* 2017, **139**, 13013–13023.
  30. D. Yuan, D. Huang, S.M. Rivero, A. Carreras, C. Zhang, Y. Zou, X. Jiao, C.R. McNeill, X. Zhu, C.-a. Di, et al. *Chem* 2019, **5**, 964–976.
  31. Y. Sun, L. Qiu, L. Tang, H. Geng, H. Wang, F. Zhang, D. Huang, W. Xu, P. Yue, Y. S. Guan, et al. *Adv. Mater.* 2016, **28**, 3351–3358.
  32. Y. Sun, P. Sheng, C. Di, F. Jiao, W. Xu, D. Qiu and D. Zhu, *Adv. Mater.* 2012, **24**, 932–937.
